# Supplementary material for: Assessment of the Feasibility and Cost of Hepatitis C Elimination in Pakistan
Source: PubMed Central journal article supplement (PMC6512462; doi:10.1001/jamanetworkopen.2019.3613), 2019-05-10
Supplement: jamanetwopen-2-e193613-s001.pdf [file jamanetwopen-2-e193613-s001.pdf]

## Supplementary Online Content

Chhatwal J, Chen Q, Wang X, et al. Assessment of the feasibility and cost of hepatitis C elimination in Pakistan. *JAMA Netw Open*. 2019;2(5):e193613.  
doi:10.1001/jamanetworkopen.2019.3613

**eAppendix.** Estimation of HCV screening cost

**eFigure 1.** Schematic showing the key components and outcomes of HEP-SIM model

**eFigure 2.** State-transition model of the natural history of HCV

**eFigure 3.** Age distribution for liver-related deaths, 2015-2030

**eTable 1.** Population characteristics of HCV-infected patients in Pakistan

**eTable 2.** Pakistan HCV cases age distribution based on national survey and applied to Pakistani age distribution

**eTable 3.** Annual transition probabilities for different Markov states used in HEP-SIM model

**eTable 4.** SVR rates by treatment, genotype, treatment history, and fibrosis states

**eTable 5.** HCV annual uptake of hepatitis C treatment in Pakistan

**eTable 6.** Cost of hepatitis C treatment, testing and disease management

**eTable 7.** Model outcomes under different scenarios

**eReferences**

This supplementary material has been provided by the authors to give readers additional information about their work.

## eAppendix. Estimation of HCV screening cost

We considered two different types of tests for HCV diagnosis: screening test and test for detection of viremia (**Table 1**). We estimated the cost per HCV case diagnosed separately for *diagnosis via usual care*, and *diagnosis via universal screening*.

For the diagnosis via usual care, we used the cost of the screening test and the test for viremia; and for the diagnosis via universal screening, the average cost per case diagnosed,  $c_{dx}$ , was determined by the following approach:

- First we estimated the number of people needed to screen,  $n_{dx}$ , to diagnose one chronic HCV-infected patient:

$$n_{dx} = \frac{1}{prev \times p_{chronic} \times sens_{screening} \times sens_{viremia} + (1 - prev \times p_{chronic}) \times (1 - spec_{screening}) \times (1 - spec_{viremia})}$$

- Then we estimated the cost of diagnosing one HCV case,  $c_{dx}$  as:

$$c_{dx} = n_{dx} * (c_{screening} + ((prev \times sens_{screening} + (1 - prev) \times (1 - spec_{screening})) \cdot c_{viremia}))$$

Where  $prev$  represents the seroprevalence of HCV,  $p_{chronic}$  represents the chronic rate (proportion of people with HCV+ antibody who have chronic HCV),  $c_{screening}$  and  $c_{viremia}$  represent the costs of screening test and the test for viremia, respectively,  $sens_{screening}$ ,  $spec_{screening}$ ,  $sens_{viremia}$ ,  $spec_{viremia}$  represent the sensitivity and specificity for screening and viremia test, respectively. The estimated values of  $c_{screening}$  and  $c_{viremia}$  depend on the choice of specific tests.

Performance characteristics of each test are defined below.<sup>2,3</sup>

- Point-of-care screening: 99.5% sensitivity and 99.8% specificity
- Nucleic acid test: 99.8% sensitivity and 99.7% specificity
- GeneXpert: 99.8% sensitivity and 99.7% specificity
- HCVcAg: 93.2% sensitivity and 98% specificity
- HCVcAg + Nucleic acid test if HCVcAg is negative: 99.8% sensitivity and 99.8% specificity

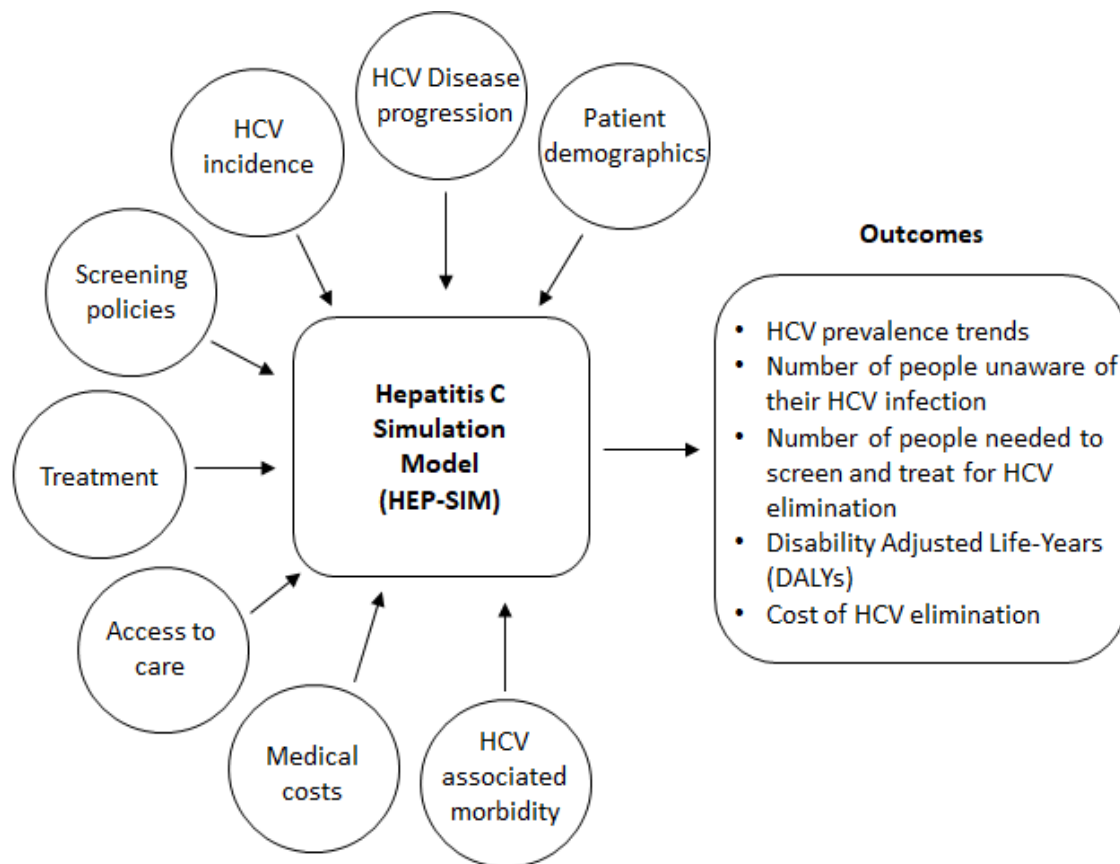

**eFigure 1.** Schematic showing the key components and outcomes of HEP-SIM model. HEP-SIM model included patient demographics, HCV disease progression, HCV screening, therapeutic advancement, access to healthcare including insurance status, and the cost of care and treatment. Outcomes of HEP-SIM include temporal trends in HCV prevalence, awareness rate of HCV-infection, HCV-associated advanced sequelae, and budget impact of different interventions.

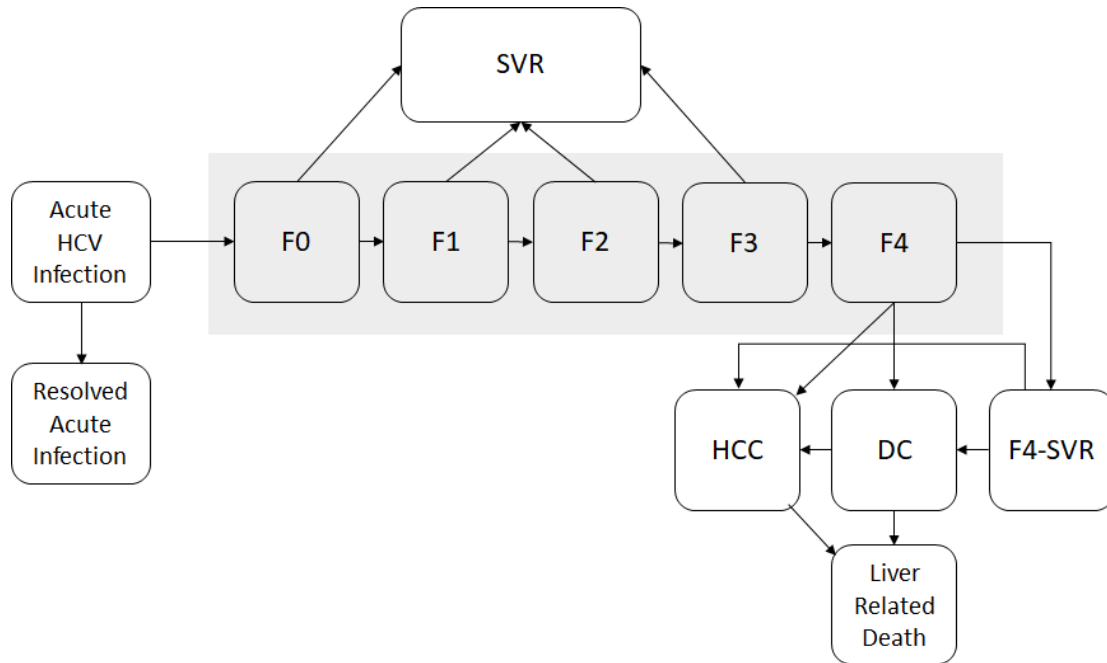

**eFigure 2.** State-transition model of the natural history of HCV (adapted from Kabiri et al.<sup>1</sup>)

At any given time, a patient is represented by one of the health states, which are shown by squares. Arrows between states represent possible transitions based on annual probabilities. Patients whose disease is successfully treated transition to the SVR state. Patients who achieve SVR from F0 to F3 states are assumed to be cured; however, patients in an F4 state who are successfully treated transition to an F4-SVR state and may develop further complications. Patients in HCC, DC, and LT states have a higher mortality rate than the general population. All other patients have the same risk for death as the general population. The probability of death from other causes exists in every state, but deaths from other causes are not shown. According to the Meta-analysis of Histologic Data in Viral Hepatitis (METAVIR) scoring system, F0 indicates no fibrosis of the liver, F1 indicates portal fibrosis without septa, F2 indicates portal fibrosis with few septa, F3 indicates many septa without cirrhosis, and F4 indicates cirrhosis.

*Abbreviations:* DC, decompensated cirrhosis; HCC, hepatocellular carcinoma; HCV, hepatitis C virus; LT, liver transplantation; SVR, sustained virologic response

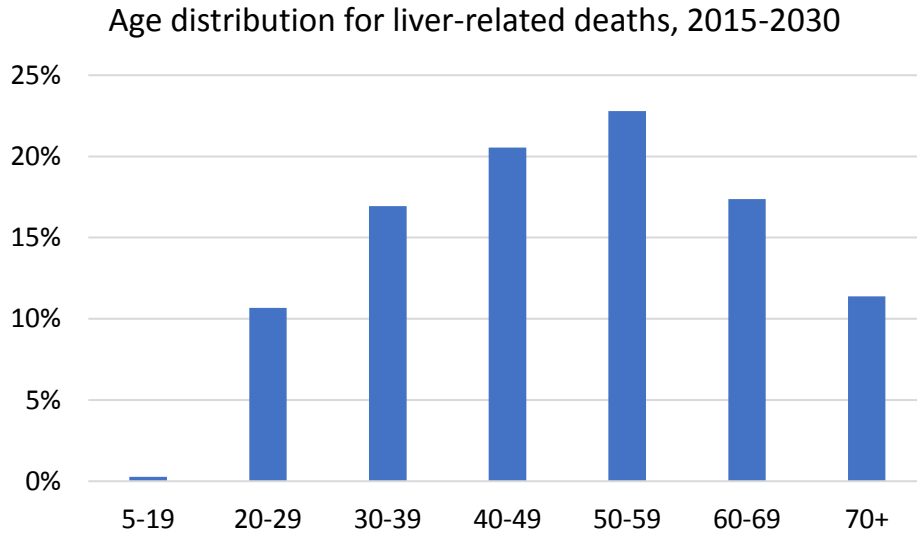

**eFigure 3.** Age distribution of HCV-related deaths from 2015–2030. From 2015 to 2030, a total of 1.44 million people are projected to die from HCV in Pakistan; 48% of HCV-related deaths would occur in people younger than 50.

**eTable 1. Population Characteristics of HCV-Infected Patients in Pakistan**

| <b>HCV-infected population characteristics</b>                         | <b>Value</b> | <b>Reference</b> |
|------------------------------------------------------------------------|--------------|------------------|
| Total chronic HCV-infected population in 2008 (million)                | 8.3          | 4                |
| Chronic infection ratio (%)                                            | 74.1%        | 5                |
| Contraindicated for treatment (%) <sup>a</sup>                         | 34.6         | 6                |
| Sex (%)                                                                |              | 4                |
| Male                                                                   | 52.48        |                  |
| Female                                                                 | 47.52        |                  |
| HCV genotype (%)                                                       |              | 7                |
| 1                                                                      | 11.51        |                  |
| 2                                                                      | 8.41         |                  |
| 3                                                                      | 67.46        |                  |
| Other                                                                  | 12.62        |                  |
| Stage distribution of HCV-infected population in 1995 <sup>b</sup> (%) |              | 8                |
| F0                                                                     | 27.20        |                  |
| F1                                                                     | 33.39        |                  |
| F2                                                                     | 17.11        |                  |
| F3                                                                     | 11.08        |                  |
| F4                                                                     | 9.61         |                  |
| DC                                                                     | 1.43         |                  |
| HCC                                                                    | 0.18         |                  |
| Age distribution for HCV-infected population in 2008 (%)               |              | 4                |
| 0-4                                                                    | 4.7          |                  |
| 5-19                                                                   | 15.3         |                  |
| 20-29                                                                  | 16.4         |                  |
| 30-39                                                                  | 19.7         |                  |
| 40-49                                                                  | 18.6         |                  |
| 50-59                                                                  | 12.3         |                  |
| 60+                                                                    | 12.9         |                  |
| Proportion of treatment-experienced patients in 1995 (%)               | 0            | HEP-SIM          |

<sup>a</sup> The ratio of patients with contraindication (with modifiable and non-modifiable reasons) among chronically-infected patients.

<sup>b</sup> We started the model in year 1995 onwards and calibrated model-predicted HCV prevalence in 2008 to data from a national survey in Pakistan.

F0 = no fibrosis; F1 = portal fibrosis without septa; F2 = portal fibrosis with few septa; F3 = numerous septa without cirrhosis; F4 = cirrhosis.

**eTable 2 Pakistan HCV cases age distribution based on national survey and applied to Pakistani age distribution.<sup>4</sup>**

| Pakistan age distribution | Population by age 2008 | HCV prevalence (%) | HCV cases | HCV case age distribution (%) |
|---------------------------|------------------------|--------------------|-----------|-------------------------------|
| 0-4                       | 20,430,456             | 1.9                | 388,179   | 4.74                          |
| 5-9                       | 20,133,813             | 2.1                | 422,810   | 5.16                          |
| 10-14                     | 20,362,502             | 2.1                | 427,613   | 5.22                          |
| 15-19                     | 19,088,301             | 2.1                | 400,854   | 4.89                          |
| 20-24                     | 16,833,804             | 4.4                | 740,687   | 9.04                          |
| 25-29                     | 13,685,642             | 4.4                | 602,168   | 7.35                          |
| 30-34                     | 11,283,919             | 7.8                | 880,146   | 10.74                         |
| 35-39                     | 9,454,026              | 7.8                | 737,414   | 9.00                          |
| 40-44                     | 8,296,061              | 9.9                | 821,310   | 10.02                         |
| 45-49                     | 7,104,877              | 9.9                | 703,383   | 8.58                          |
| 50-54                     | 5,548,910              | 10.4               | 577,087   | 7.04                          |
| 55-59                     | 4,182,016              | 10.4               | 434,930   | 5.31                          |
| 60-64                     | 3,480,358              | 10.0               | 348,036   | 4.25                          |
| 65-69                     | 2,851,939              | 10.0               | 285,194   | 3.48                          |
| 70-74                     | 1,985,374              | 10.0               | 198,537   | 2.42                          |
| 75-79                     | 1,261,872              | 10.0               | 126,187   | 1.54                          |
| 80-84                     | 667,228                | 10.0               | 66,723    | 0.81                          |
| 85+                       | 356,985                | 10.0               | 35,699    | 0.44                          |
| <b>Total</b>              | 167,008,083            |                    | 8,196,956 | 100%                          |

Because the above survey excluded people who injected drugs,<sup>4</sup> we added HCV cases among people using drugs based on data from Pakistan AIDS Control Program that estimated that in 2015, 104,804 people injected drugs in Pakistan and 89% of people who inject drugs had chronic HCV.<sup>9,10</sup>

**eTable 3. Annual transition probabilities for different Markov states used in HEP-SIM model**

| Input                                                          | Base case | Values for sensitivity analysis |              |         |          |
|----------------------------------------------------------------|-----------|---------------------------------|--------------|---------|----------|
|                                                                |           | Range                           | Distribution | Alpha   | Beta     |
| <b>Transition probabilities (annual)</b>                       |           |                                 |              |         |          |
| F0 to F1 <sup>11</sup>                                         | 0.117     | 0.104–0.130                     | Beta         | 274.98  | 2,075.30 |
| F1 to F2 <sup>11</sup>                                         | 0.085     | 0.075–0.096                     | Beta         | 210.06  | 2,261.18 |
| F2 to F3 <sup>11</sup>                                         | 0.120     | 0.109–0.133                     | Beta         | 288.05  | 2,112.38 |
| F3 to F4 <sup>11</sup>                                         | 0.116     | 0.104–0.129                     | Beta         | 270.61  | 2,062.22 |
| F4 to DC <sup>12</sup>                                         | 0.039     | 0.010–0.079                     | Beta         | 3.51    | 86.48    |
| F4 to HCC <sup>12</sup>                                        | 0.014     | 0.010–0.079                     | Beta         | 0.18    | 12.38    |
| Post F4-SVR to DC <sup>13</sup>                                | 0.008     | 0.002–0.036                     | Beta         | 0.31    | 38.58    |
| Post F4-SVR to HCC <sup>13</sup>                               | 0.005     | 0.002–0.013                     | Beta         | 1.49    | 297.13   |
| DC to HCC <sup>14</sup>                                        | 0.068     | 0.030–0.083                     | Beta         | 73.58   | 1008.49  |
| DC (first year) to death from liver disease <sup>14</sup>      | 0.182     | 0.065–0.190                     | Beta         | 1626.40 | 7309.88  |
| DC (subsequent year) to death from liver disease <sup>14</sup> | 0.112     | 0.065–0.190                     | Beta         | 7.03    | 55.77    |
| HCC to death from liver disease <sup>12</sup>                  | 0.427     | 0.330–0.860                     | Beta         | 2.14    | 2.87     |

Abbreviations: SVR, sustained virologic response; F0–F4, METAVIR fibrosis score; DC, decompensated cirrhosis; HCC, hepatocellular carcinoma; F4-SVR. Post-SVR state of treated cirrhotic patient



**eTable 4. SVR rates by treatment, genotype, treatment history, and fibrosis states**

| Treatment history and fibrosis state                                                                                         | GT1  | GT2  | GT3  | GT4-6 | References |
|------------------------------------------------------------------------------------------------------------------------------|------|------|------|-------|------------|
| <b>PEG+RBV</b>                                                                                                               |      |      |      |       |            |
| Treatment naïve                                                                                                              |      |      |      |       | 1,15-19    |
| F0-F3                                                                                                                        | 0.54 | 0.82 | 0.70 | 0.58  |            |
| F4                                                                                                                           | 0.36 | 0.64 | 0.49 | 0.32  |            |
| Contraindicated with modifiable reasons                                                                                      |      |      |      |       |            |
| F0-F2                                                                                                                        | -    | 0.66 | 0.56 | 0.46  |            |
| F3                                                                                                                           | 0.43 | 0.66 | 0.56 | 0.46  |            |
| F4                                                                                                                           | 0.28 | 0.51 | 0.40 | 0.26  |            |
| Failed PEG+RBV: relapse                                                                                                      |      |      |      |       |            |
| F0-F3                                                                                                                        | 0.27 | 0.71 | 0.66 | 0.31  |            |
| F4                                                                                                                           | 0.13 | 0.56 | 0.52 | 0.24  |            |
| Failed PEG+RBV: partial response                                                                                             |      |      |      |       |            |
| F0-F3                                                                                                                        | 0.18 | 0.69 | 0.64 | 0.31  |            |
| F4                                                                                                                           | 0.10 | 0.55 | 0.51 | 0.24  |            |
| Failed PEG+RBV: null response                                                                                                |      |      |      |       |            |
| F0-F3                                                                                                                        | 0.10 | 0.54 | 0.50 | 0.31  |            |
| F4                                                                                                                           | 0.05 | 0.42 | 0.39 | 0.24  |            |
| <b>DAA NS5A<sup>1</sup></b>                                                                                                  |      |      |      |       |            |
| Treatment naïve, contraindicated, failed PEG+RBV, failed BOC/TEL+PEG+RBV (GT1 only), failed DAA non-NS5A, failed DAA nonNS5A |      |      |      |       | 20-28      |
| F0-F3                                                                                                                        | 0.95 | 0.99 | 0.95 | 0.99  |            |
| F4                                                                                                                           | 0.9  | 0.99 | 0.9  | 0.99  |            |

<sup>1</sup>DAA1 NS5A includes any of the following drug combinations: LDV/SOF+/-RBV, SOF+DCV, DCV+PEG+/-RBV, and SOF/VEL.

**Abbreviations:** GT, genotype; PEG, peginterferon; RBV, ribavirin; BOC, boceprevir; TEL, telaprevir; DAA, direct-acting antiviral; NS5A, nonstructural protein 5A; SOF, sofosbuvir; LDV, ledipasvir; DCV, daclatasvir; VEL, velpatasvir.

**eTable 5. HCV Annual Uptake of Hepatitis C Treatment in Pakistan**

| <b>Year</b> | <b>Treated Cases</b> |
|-------------|----------------------|
| <b>2004</b> | 11,809               |
| <b>2005</b> | 19,828               |
| <b>2006</b> | 30,675               |
| <b>2007</b> | 50,857               |
| <b>2008</b> | 70,499               |
| <b>2009</b> | 85,000               |
| <b>2010</b> | 85,000               |
| <b>2011</b> | 85,000               |
| <b>2012</b> | 85,000               |
| <b>2013</b> | 85,000               |
| <b>2014</b> | 85,000               |
| <b>2015</b> | 65,385               |
| <b>2016</b> | 160,650              |
| <b>2017</b> | 160,650              |

Source: Polaris observatory data (<http://cdafound.org/polaris-hepC-dashboard/>, extracted in October 2017)

**eTable 6. Cost of hepatitis C treatment, testing and disease management**

| Cost                                           | Value (\$) |
|------------------------------------------------|------------|
| <b>Health state costs (annual)<sup>a</sup></b> |            |
| F0                                             | 27         |
| F1                                             | 27         |
| F2                                             | 28         |
| F3                                             | 56         |
| Compensated cirrhosis                          | 63         |
| Decompensated Cirrhosis                        | 636        |
| Hepatocellular Cancer                          | 1216       |
| <b>Testing cost (one-time)</b>                 |            |
| Laboratory-based antibody test                 | 18         |
| Point-of-care antibody test (screening)        | 5          |
| GeneXpert                                      | 20         |
| HCVcAg test                                    | 25         |
| NAT                                            | 137        |
| <b>Treatment cost (one-time)</b>               |            |
| Peginterferon-ribavirin                        | 60         |
| DAA                                            | 60         |

Abbreviations: SVR, sustained virologic response; F0–F4, METAVIR fibrosis score; DC, decompensated cirrhosis; HCC, hepatocellular carcinoma; F4-SVR, Post-SVR state of treated cirrhotic patient; NAT, nucleic acid test; DAA, direct-acting antiviral; HCVcAg, HCV core antigen.

<sup>a</sup>We estimated annual healthcare costs associated with HCV disease management using WHO CHOICE tool. In particular, we extracted inpatient and outpatient primary costs from the World Health Organization's CHOosing Interventions that are Cost Effective (CHOICE) project (<https://www.who.int/choice/toolkit/en/>) and took the weighted average of cost per inpatient visit and cost per outpatient visit for each HCV-associated health state. The ratios of weights (inpatient: outpatient) were 0.38:0.62 for F0–F4, 0.43:0.57 for compensated cirrhosis, 0.66:0.34 for decompensated cirrhosis, and 0.55:0.45 for hepatocellular carcinoma as reported by McAdam Marx.<sup>7</sup> We then estimated the ratio of the above costs in Pakistan to United States. Finally, we estimated Pakistan specific HCV disease costs by multiplying this ratio with HCV costs in the United States as reported in McAdam Marx et al.<sup>29</sup> and Chhatwal et al.<sup>6</sup>

**eTable 7 Model outcomes under different scenarios**

| <b>Key model outcomes</b>                                                     | <b>Base case</b> | <b>Increasing HCV incidence by 2% per year</b> | <b>HCV prevalence increased by 20% in 2018<sup>a</sup></b> | <b>HCV awareness rate of 7% in 2018<sup>b</sup></b> |
|-------------------------------------------------------------------------------|------------------|------------------------------------------------|------------------------------------------------------------|-----------------------------------------------------|
| <b>To reach HCV elimination</b>                                               |                  |                                                |                                                            |                                                     |
| <b>Number diagnosed per year</b>                                              | 900,000          | 950,000                                        | 1,050,000                                                  | 1,050,000                                           |
| <b>Number treated per year</b>                                                | 700,000          | 800,000                                        | 900,000                                                    | 700,000                                             |
| <b>HCV prevalence in 2030</b>                                                 | 89,191           | 222,430                                        | 82,697                                                     | 103,466                                             |
| <b>Reduction compared to 2015</b>                                             | 98.9%            | 97.3%                                          | 99.2%                                                      | 98.8%                                               |
| <b>HCV incidence in 2030</b>                                                  | 9,181            | 364,000                                        | 4,616                                                      | 12,908                                              |
| <b>Reduction compared to 2015</b>                                             | 96.7%            | -- <sup>c</sup>                                | 98.6%                                                      | 95.4%                                               |
| <b>Number of death averted between 2015–2030</b>                              | 323,443          | 329,952                                        | 381,409                                                    | 391,003                                             |
| <b>DALYs averted between 2015-2030</b>                                        | 13,011,508       | 13,252,919                                     | 15,325,227                                                 | 15,658,989                                          |
| <b>Total cost of HCV management between 2018-2030 (\$, millions)</b>          | 10,006           | 11,199                                         | 11,652                                                     | 10,410                                              |
| <b>Cost-saving from new diagnostic tests between 2018-2030 (\$, millions)</b> | 2,551            | 2,945                                          | 3,167                                                      | 2,961                                               |

<sup>a</sup> The current HCV prevalence is 20% higher (i.e., 9.6 million in 2018) than that in the base case (with 8.0 million).

<sup>b</sup> The current HCV awareness rate is 7% (in contrast to 12.7% in base case in 2018).

<sup>c</sup> For the “Increasing HCV Incidence” Scenario, the incidence reduction target cannot be achieved because the increasing incidence was used as model inputs. The diagnosis and treatment rates were selected based on the feasibility of other three elimination targets.

## eReferences

1. Kabiri M, Jazwinski AB, Roberts MS, Schaefer AJ, Chhatwal J. The changing burden of hepatitis C in the United States: Model-based predictions. *Annals of internal medicine* 2014; **161**(3): 170-80.
2. Fourati S, Feld JJ, Chevaliez S, Luhmann N. Approaches for simplified HCV diagnostic algorithms. 2018; **21**(S2): e25058.
3. Chevaliez S, Pawlotsky J-M. New virological tools for screening, diagnosis and monitoring of hepatitis B and C in resource-limited settings. *Journal of hepatology* 2018; **69**(4): 916-26.
4. Qureshi H, Bile KM, Jooma R, Alam SE, Afridi HU. Prevalence of hepatitis B and C viral infections in Pakistan: findings of a national survey appealing for effective prevention and control measures. *Eastern Mediterranean health journal = La revue de sante de la Mediterranee orientale = al-Majallah al-sihhiyah li-sharq al-mutawassit* 2010; **16 Suppl**: S15-23.
5. Ahmed W, Qureshi H, Arif A, Alam SE. Changing trend of viral hepatitis--"A twenty one year report from Pakistan Medical Research Council Research Centre, Jinnah Postgraduate Medical Centre, Karachi". *JPMA The Journal of the Pakistan Medical Association* 2010; **60**(2): 86-9.
6. Chhatwal J, Chen Q, Aggarwal R. Estimation of Hepatitis C Disease Burden and Budget Impact of Treatment Using Health Economic Modeling. *Infectious Disease Clinics* 2018; **32**(2): 461-80.
7. Idrees M, Riazuddin S. Frequency distribution of hepatitis C virus genotypes in different geographical regions of Pakistan and their possible routes of transmission. *BMC infectious diseases* 2008; **8**: 69.
8. Ahmad W, Ijaz B, Javed FT, et al. A comparison of four fibrosis indexes in chronic HCV: development of new fibrosis-cirrhosis index (FCI). *BMC gastroenterology* 2011; **11**: 44.
9. Bergenstrom A, Achakzai B, Furqan S, ul Haq M, Khan R, Saba M. Drug-related HIV epidemic in Pakistan: a review of current situation and response and the way forward beyond 2015. *Harm Reduct J* 2015; **12**: 43.
10. Mumtaz GR, Weiss HA, Thomas SL, et al. HIV among people who inject drugs in the Middle East and North Africa: systematic review and data synthesis. *PLoS medicine* 2014; **11**(6): e1001663.
11. Thein H, Yi Q, Dore G, Krahn M. Estimation of stage specific fibrosis progression rates in chronic hepatitis C virus infection: A meta analysis and meta regression. *Hepatology (Baltimore, Md)* 2008; **48**(2): 418-31.
12. Fattovich G, Giustina G, Degos F, et al. Morbidity and mortality in compensated cirrhosis type C: a retrospective follow-up study of 384 patients. *Gastroenterology* 1997; **112**(2): 463-72.
13. Cardoso AC, Moucari R, Figueiredo-Mendes C, et al. Impact of peginterferon and ribavirin therapy on hepatocellular carcinoma: incidence and survival in hepatitis C patients with advanced fibrosis. *Journal of hepatology* 2010; **52**(5): 652-7.
14. Planas R, Ballesté B, Antonio Álvarez M, et al. Natural history of decompensated hepatitis C virus-related cirrhosis. A study of 200 patients. *Journal of hepatology* 2004; **40**(5): 823-30.
15. Shiffman ML, Suter F, Bacon BR, et al. Peginterferon Alfa-2a and Ribavirin for 16 or 24 Weeks in HCV Genotype 2 or 3. *New England Journal of Medicine* 2007; **357**(2): 124-34.
16. McHutchison JG, Lawitz EJ, Shiffman ML, et al. Peginterferon Alfa-2b or Alfa-2a with Ribavirin for Treatment of Hepatitis C Infection. *New England Journal of Medicine* 2009; **361**(6): 580-93.
17. Talal A, LaFleur J, Hoop R, et al. Absolute and relative contraindications to pegylated-interferon or ribavirin in the US general patient population with chronic hepatitis C: results from a US database of over 45 000 HCV-infected, evaluated patients. *Alimentary pharmacology & therapeutics* 2013; **37**(4): 473-81.
18. Shiffman ML, Di Bisceglie AM, Lindsay KL, et al. Peginterferon Alfa-2a and ribavirin in patients with chronic hepatitis C who have failed prior treatment1, 2, 3 1 2 3. *Gastroenterology* 2004; **126**(4): 1015-23.
19. Poynard T, Colombo M, Bruix J, et al. Peginterferon alfa-2b and ribavirin: effective in patients with hepatitis C who failed interferon alfa/ribavirin therapy. *Gastroenterology* 2009; **136**(5): 1618-28.
20. Kowdley KV, Gordon SC, Reddy KR, et al. Ledipasvir and sofosbuvir for 8 or 12 weeks for chronic HCV without cirrhosis. *New England Journal of Medicine* 2014; **370**(20): 1879-88.
21. Sulkowski MS, Gardiner DF, Rodriguez-Torres M, et al. Daclatasvir plus sofosbuvir for previously treated or untreated chronic HCV infection. *New England Journal of Medicine* 2014; **370**(3): 211-21.
22. Afdhal N, Reddy KR, Nelson DR, et al. Ledipasvir and sofosbuvir for previously treated HCV genotype 1 infection. *The New England journal of medicine* 2014; **370**(16): 1483-93.
23. Feld JJ, Kowdley KV, Coakley E, et al. Treatment of HCV with ABT-450/r-ombitasvir and dasabuvir with ribavirin. *The New England journal of medicine* 2014; **370**(17): 1594-603.

24. Ferenci P, Bernstein D, Lalezari J, et al. ABT-450/r–Ombitasvir and Dasabuvir with or without Ribavirin for HCV. *New England Journal of Medicine* 2014; **370**(21): 1983-92.
25. Poordad F, Hezode C, Trinh R, et al. ABT-450/r-ombitasvir and dasabuvir with ribavirin for hepatitis C with cirrhosis. *The New England journal of medicine* 2014; **370**(21): 1973-82.
26. Zeuzem S, Jacobson IM, Baykal T, et al. Retreatment of HCV with ABT-450/r-ombitasvir and dasabuvir with ribavirin. *The New England journal of medicine* 2014; **370**(17): 1604-14.
27. Flisiak R, Janczewska E, Wawrzynowicz-Syczewska M, et al. Real-world effectiveness and safety of ombitasvir/paritaprevir/ritonavir +/- dasabuvir +/- ribavirin in hepatitis C: AMBER study. *Alimentary pharmacology & therapeutics* 2016; **44**(9): 946-56.
28. Feld JJ, Jacobson IM, Hézode C, et al. Sofosbuvir and Velpatasvir for HCV Genotype 1, 2, 4, 5, and 6 Infection. *New England Journal of Medicine* 2015; **373**(27): 2599-607.
29. McAdam-Marx C, McGarry LJ, Hane CA, Biskupiak J, Deniz B, Brixner DI. All-cause and incremental per patient per year cost associated with chronic hepatitis C virus and associated liver complications in the United States: A managed care perspective. *J Manag Care Pharm* 2011; **17**(7): 531-46.
